# Supplementary material for: Stripping voltammetric determination of pyridine-2-aldoxime methochloride at the iron(iii) doped zeolite modified glassy carbon electrode
Source: Royal Society of Chemistry journal article supplement (doi:10.1039/c2an35851d), 2012-01-01
Supplement: c2an35851d.pdf [file c2an35851d.pdf]

## Supplement information 1

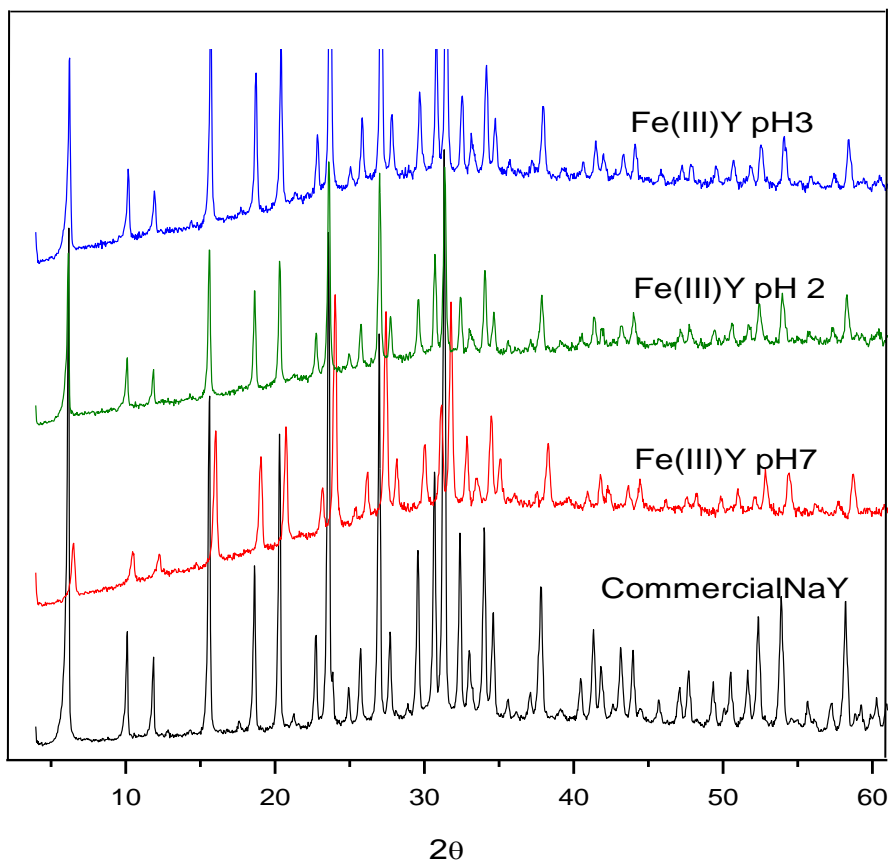

Optimization process was carried out for different doping pH condition. The above figure shows x-ray diffraction patterns for faujasite zeolite type (NaY) doped with iron (III) at different pHs compared with that of commercial NaY.

## Supplement information 2

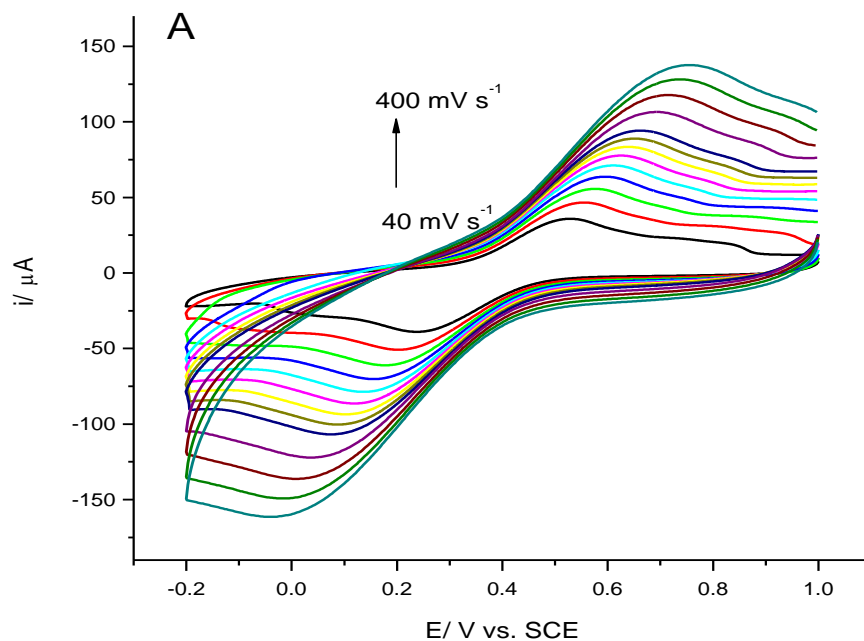

Cyclic voltammograms of Fe<sup>3+</sup>/Fe<sup>2+</sup> in 0.3 K<sub>2</sub>SO<sub>4</sub> solutions at Fe<sup>3+</sup>Y modified electrode without acid treatment at various scan rates: 40, 60, 80, 100, 120, 140, 160, 180, 200, 250, 300, 350 and 400 mV s<sup>-1</sup>.

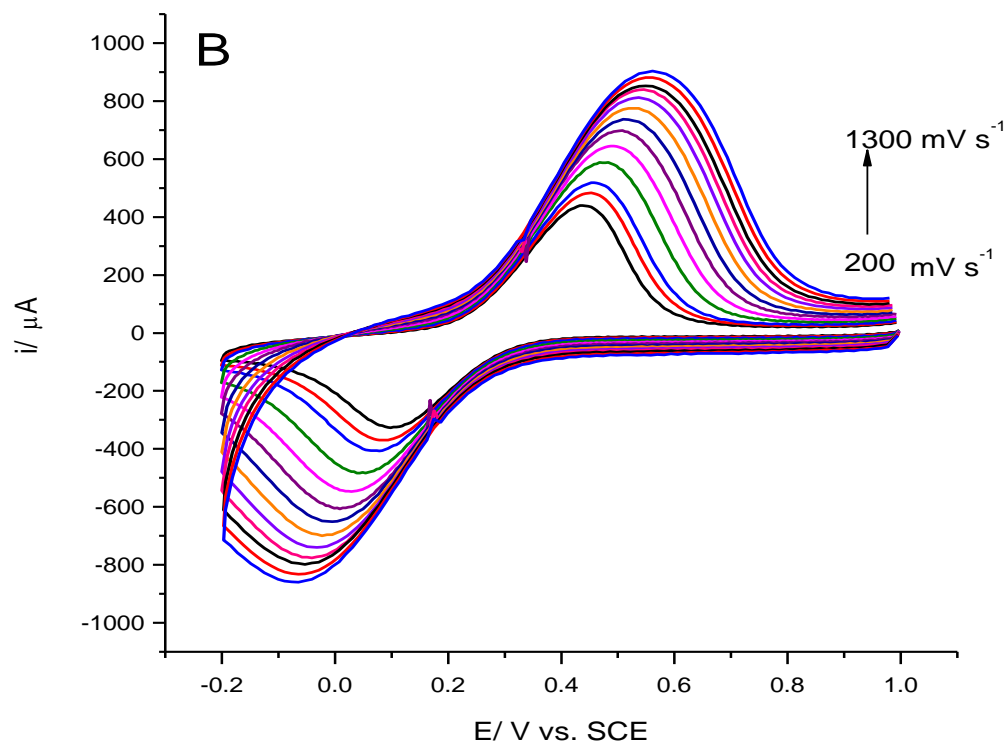

Cyclic voltammograms of  $\text{Fe}^{3+}/\text{Fe}^{2+}$  in  $0.3 \text{ K}_2\text{SO}_4$  solutions at  $\text{Fe}^{3+}\text{Y}$  modified electrode with acid treatment at various scan rates: 200, 250, 300, 400, 500, 600, 700, 800, 900, 1000, 1100, 1200 and  $1300 \text{ mV s}^{-1}$ .

### Supplement information 3

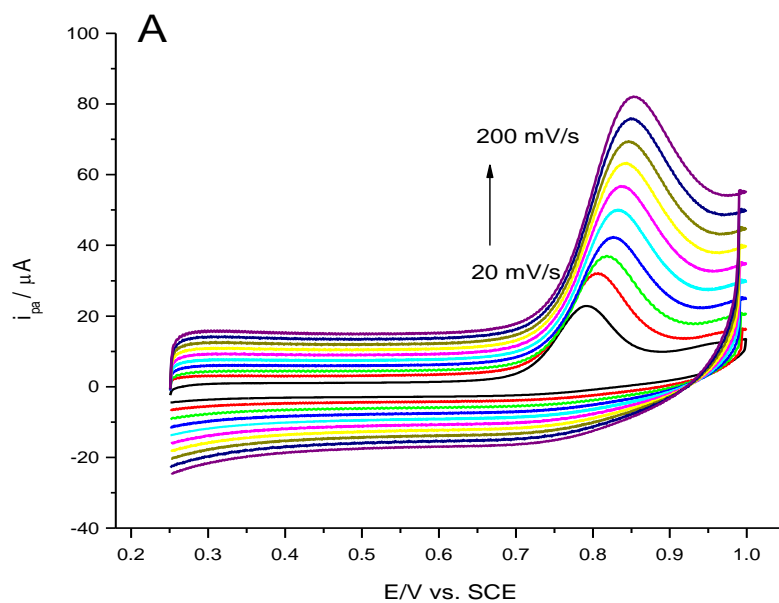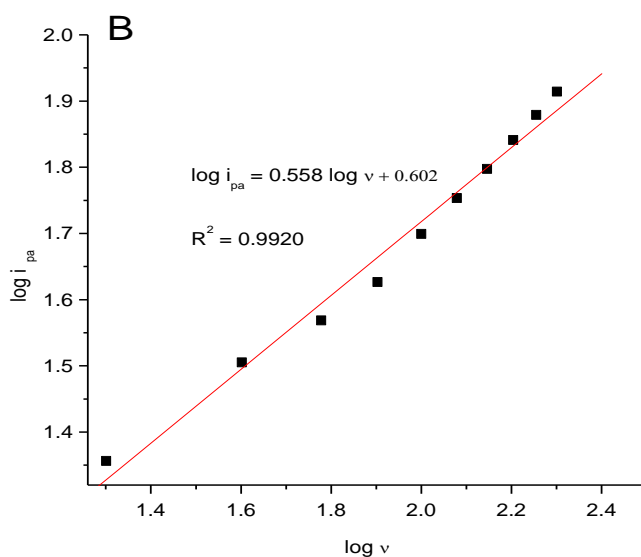

(A) Cyclic voltammograms of PAM-2 (50  $\mu\text{M}$ ) in phosphate buffer solution pH 7.0 at  $\text{Fe}^{3+}\text{Y}$  modified electrode with various scan rates: 20, 40, 60, 80, 100, 120, 140, 160, 180, and 200  $\text{mV s}^{-1}$ .

(B) Plot of  $\log i_p$  versus  $\log \nu$
